# Supplementary material
Source: publisher figshare collection journal article supplement (https://acs.figshare.com/ndownloader/files/4750045)
Supplement: Supplementary file 1 [file 4750045]

## Supplemental Fig. S1

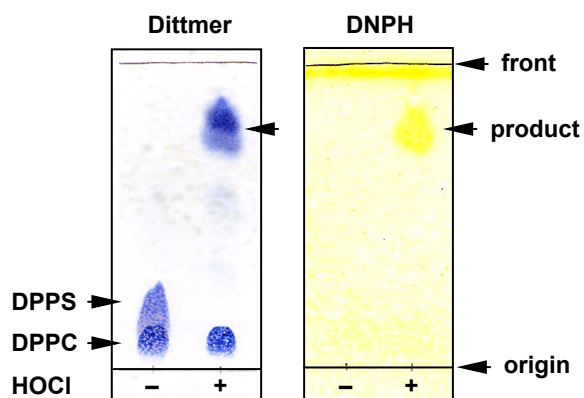

**Supplemental Fig. S1. Carbonyl formation in HOCl-treated DPPS.** DPPC (1 mM) and DPPS (1 mM) were emulsified in phosphate buffer (pH 7.4) and incubated with HOCl (0 or 1 mM) at 37 °C for 1 h. After incubation, lipids were extracted and applied to silica TLC plates. *Left*, Dittmer reagent for detection of phosphate groups; *right*, DNPH reagent for detection of carbonyl groups.

## Supplemental Fig. S2

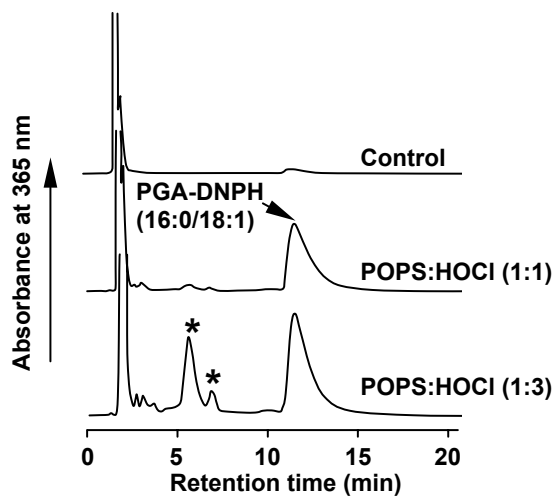

Supplemental Fig. S2. **Formation of PGA and the chlorohydrin derivative in HOCl-treated 1-palmitoyl-2-oleoyl-PS.** 1-Palmitoyl-2-oleoyl-PS (POPS, 5 mM) was emulsified in phosphate buffer (pH 7.4) and incubated with HOCl (5 or 15 mM) at 37 °C for 1 h. After incubation, the reaction mixtures were derivatized with DNPH and analyzed by HPLC. Asterisks indicate chlorohydrin derivative of PGA.
